# Supplementary material
Source: PubMed Central journal article supplement (PMC10546296)

## Supplementary Online Content

Harstad E, Hanson E, Brewster SJ, et al. Persistence of autism spectrum disorder from early childhood through school age. *JAMA Pediatr*. Published online October 2, 2023. doi:10.1001/jamapediatrics.2023.4003

**eTable.** Differences Between Study Participants and a Subset of Eligible Nonparticipants

**eMethods.** Description of Imputation Methods

**eFigure 1.** IQ Distributions for Children With Nonpersistent ASD and Persistent ASD, Separately

**eFigure 2.** Probability of Persistent ASD at Research Assessment as a Function of Baseline Vineland Adaptive Scores

This supplementary material has been provided by the authors to give readers additional information about their work.

**eTable 1. Differences between Study Participants and a Subset of Eligible Non-Participants**

| Variable<br>Mean (SD) or %                 | Study Sample<br>(N=213) | Eligible<br>Non-Participants<br>(N=68) <sup>a</sup> | t-test/Chi-<br>square | E.S. Cohen's<br>D <sup>b</sup> |
|--------------------------------------------|-------------------------|-----------------------------------------------------|-----------------------|--------------------------------|
| Age at Clinical ASD<br>Diagnosis           | 24.6 (3.8)              | 24.1 (4.8)                                          | 0.75                  | 0.11                           |
| Bayley Cognitive                           | 81.4 (15.0)             | 79.1 (14.6)                                         | -1.38                 | 0.15                           |
| Bayley Language                            | 65.2 (15.7)             | 59.4 (12.9)                                         | 2.43*                 | 0.39                           |
| Vineland Adaptive<br>Behavior<br>Composite | 73.5 (10.2)             | 67.0 (18.0)                                         | 3.44*                 | 0.53                           |
| Vineland<br>Communication                  | 68.6 (16.5)             | 59.2 (23.5)                                         | 3.41*                 | 0.51                           |
| Sex, male                                  | 83.1%                   | 75%                                                 | 2.21                  |                                |
| Race <sup>c</sup>                          |                         |                                                     | 7.96                  |                                |
| Asian                                      | 3.9%                    | 5.9%                                                |                       |                                |
| Black                                      | 7.2%                    | 11.8%                                               |                       |                                |
| Native American                            | 1.7%                    | 0%                                                  |                       |                                |
| Other                                      | 7.2%                    | 17.6%                                               |                       |                                |
| White                                      | 80.2%                   | 64.7%                                               |                       |                                |
| Income <sup>d</sup>                        |                         |                                                     | 4.46                  |                                |
| Low                                        | 4.2%                    | 10.3%                                               |                       |                                |
| Moderate                                   | 28.2%                   | 30.9%                                               |                       |                                |
| Middle                                     | 55.4%                   | 47.1%                                               |                       |                                |
| Upper                                      | 11.7%                   | 11.8%                                               |                       |                                |
| Ethnicity <sup>c</sup>                     |                         |                                                     | 9.14*                 |                                |
| Hispanic                                   | 9.6%                    | 27.5%                                               |                       |                                |
| Not Hispanic                               | 90.4%                   | 72.5%                                               |                       |                                |

<sup>a</sup>We abstracted baseline medical record data on a random subset of eligible non-participants drawn from the initial population of 1,120 eligible children (n=68, determined to allow detection of medium level standardized differences of a 0.5 standard deviation when contrasting two means) to compare them with study participants.<sup>42</sup>

<sup>b</sup>Effect size conventions are as follows: .02(small), .5(medium), and .8(large) based on Cohen, (1992). Note that these analyses were run with excessive levels of power. Specifically, for a medium effect size, power for n=68 and n=213 of a t-test was equal to 94.5%, which is excessive. Thus, we supplemented these results with indices of effect size to aid interpretation of the two groups' differences. Significance was corrected for experimenter-wise error using the Benjamini-Hochberg correction with a false discovery rate equal to the  $\alpha=5\%$ .

<sup>c</sup>Note that the race and ethnicity data for this comparison were drawn from medical record data, as that was all that was available for the Non-participant group.

<sup>d</sup>Income was estimated via census tracts based zip code at ASD clinical diagnosis.

\* $p<0.05$

**eMethods Description of Imputation Methods:** A multiple imputation procedure was implemented to account for the missing data in baseline cognitive, language and adaptive functioning. Specifically, the percent of missing data was 0.005% in cognition, 19.7% in language, and 12.7% in adaptive functioning. The multiple imputation procedure involved creating 50 imputed datasets with several auxiliary variables that were not part of the predictive model (e.g., PLS scores). Subsequently, logistic models were fitted for each imputed dataset and estimates were pooled across replications. The method of imputation involved maximum likelihood (ML) and the method of analysis maximum likelihood with robust standard errors (MLR) so that non-normality of the predictors would be accounted for.

**eFigure 1. IQ Distributions for Children with Non-Persistent ASD and Persistent ASD, Separately**

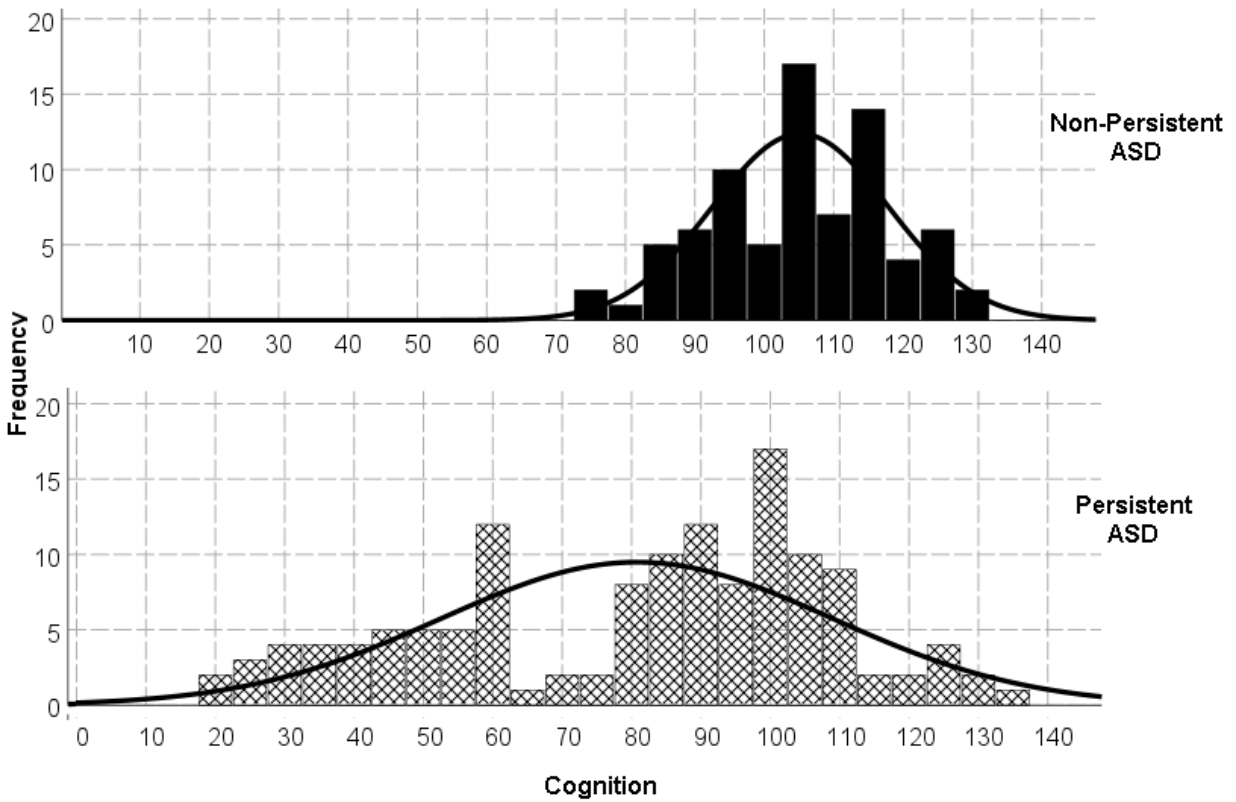

**eFigure 2. Probability of Persistent ASD at Research Assessment as a Function of Baseline Vineland Adaptive Scores**

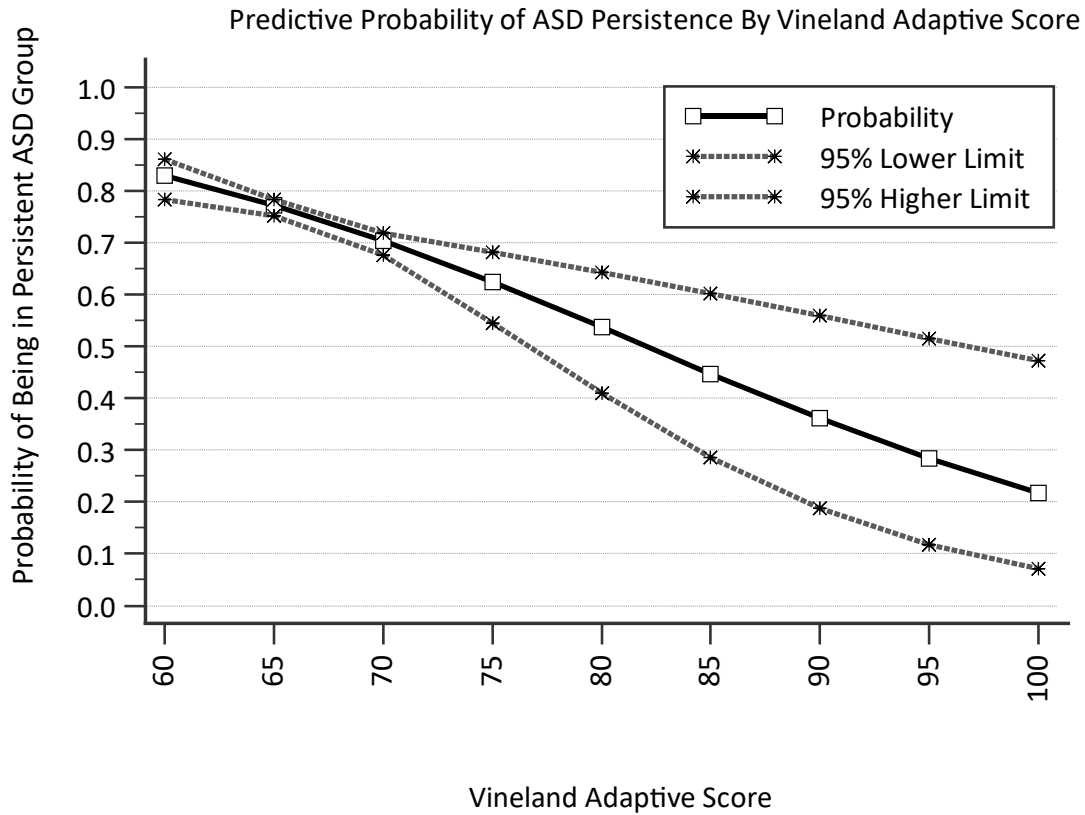

Supplement: jamapediatr-e234003-s001.pdf [file jamapediatr-e234003-s001.pdf]
