# Supplementary material
Source: PubMed Central journal article supplement (PMC10546296)
Supplement: jamapediatr-e234003-s002.pdf [file jamapediatr-e234003-s002.pdf]

## Data Sharing Statement

Harstad. Persistence of Autism Spectrum Disorder From Early Childhood Through School Age. *JAMA Pediatr.* Published October 02, 2023. doi:10.1001/jamapediatrics.2023.4003

### Data

**Data available:** No

### Additional Information

**Explanation for why data not available:** This is the first publication from a long-term study, and we will actively be working on additional analyses for publication.
